# Supplementary material
Source: PubMed Central journal article supplement (PMC2727391)
Supplement: msn187_2.pdf [file msn187_2.pdf]

Figure S2. Histograms and SiZer maps of gene duplication ages for 14 species of Compositae. X-axes of all figures are  $K_s$ , whereas histogram y-axes are the number of gene duplications. SiZer maps below histograms identify significant features at corresponding  $K_s$  values based on multiple kernel density estimates of the data with blue areas indicating significantly increasing slopes, red indicating significantly decreasing slopes, purple representing no significant slope change, and gray indicating not enough data for the test.

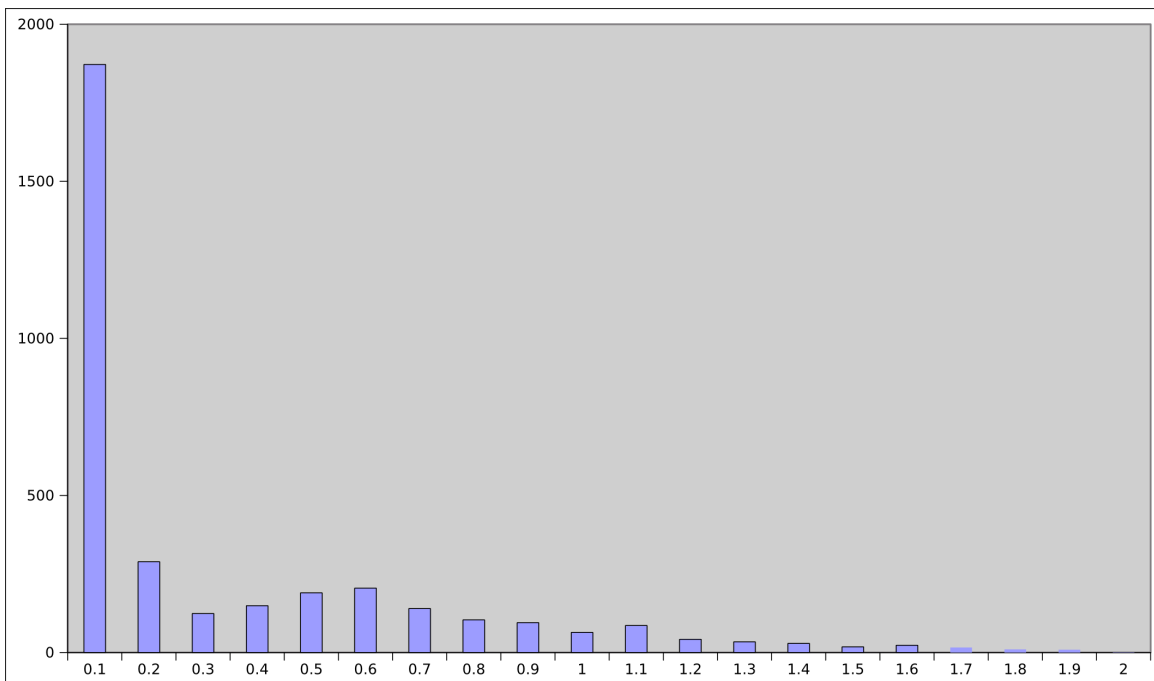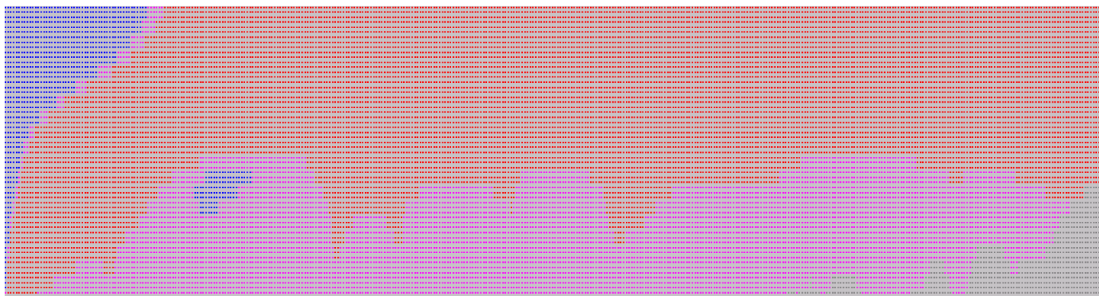

***Helianthus annuus***

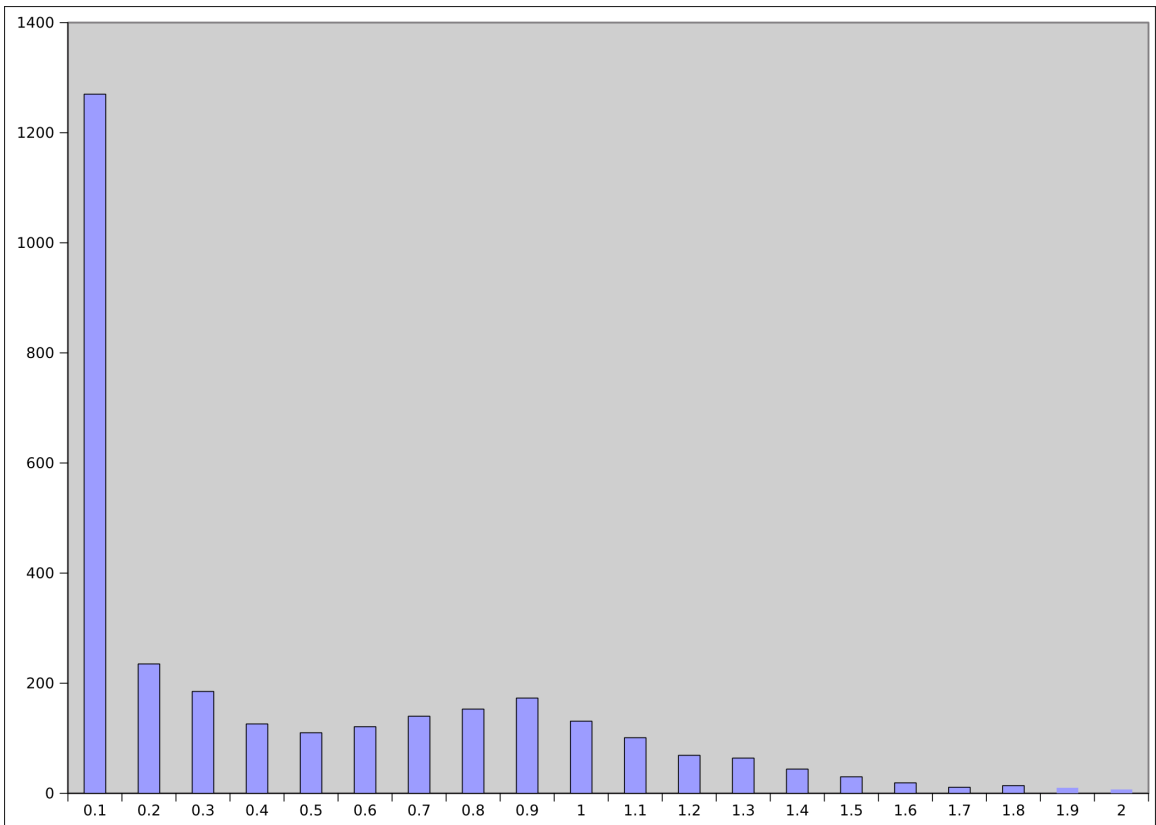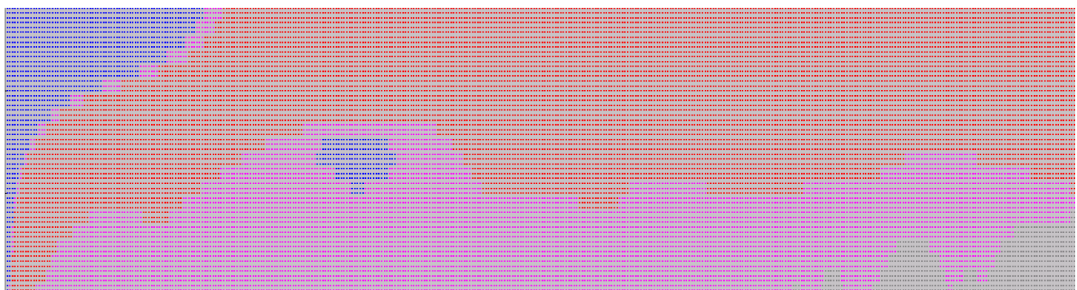

***Lactuca sativa***

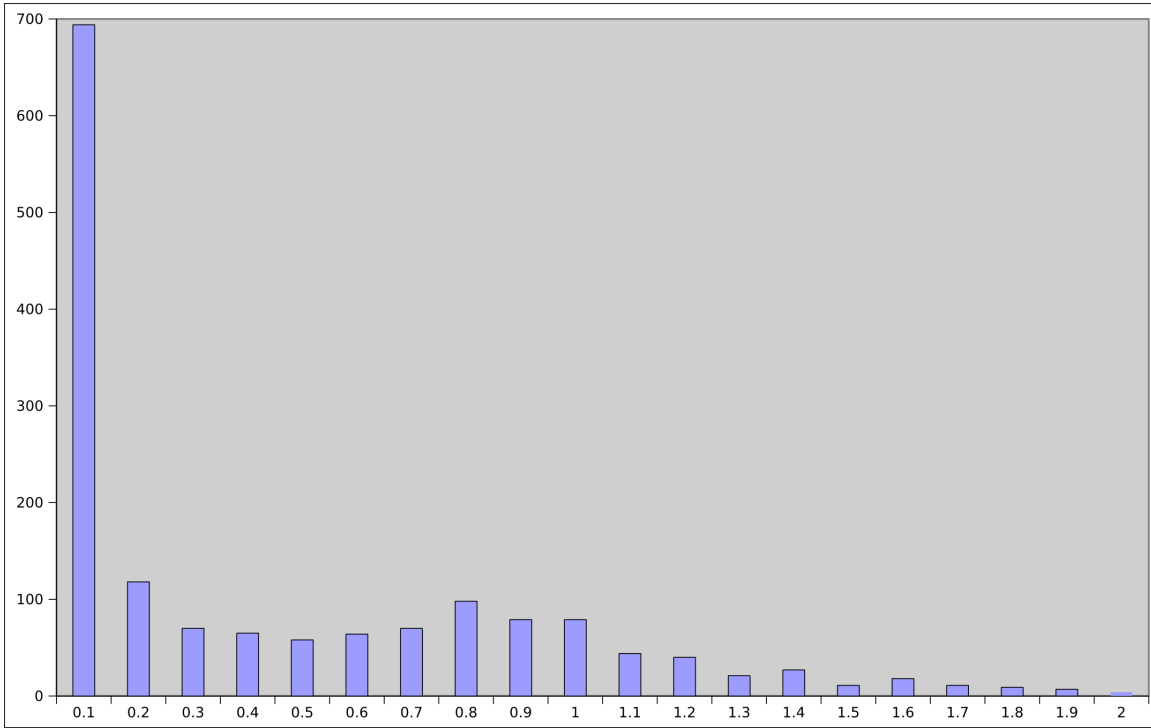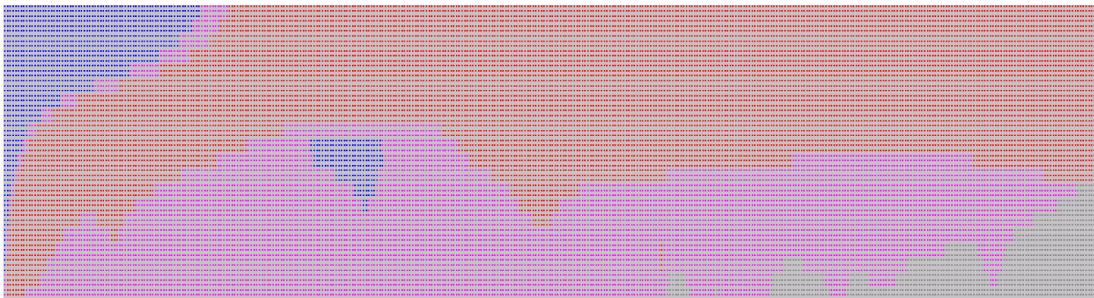

***Lactuca serriola***

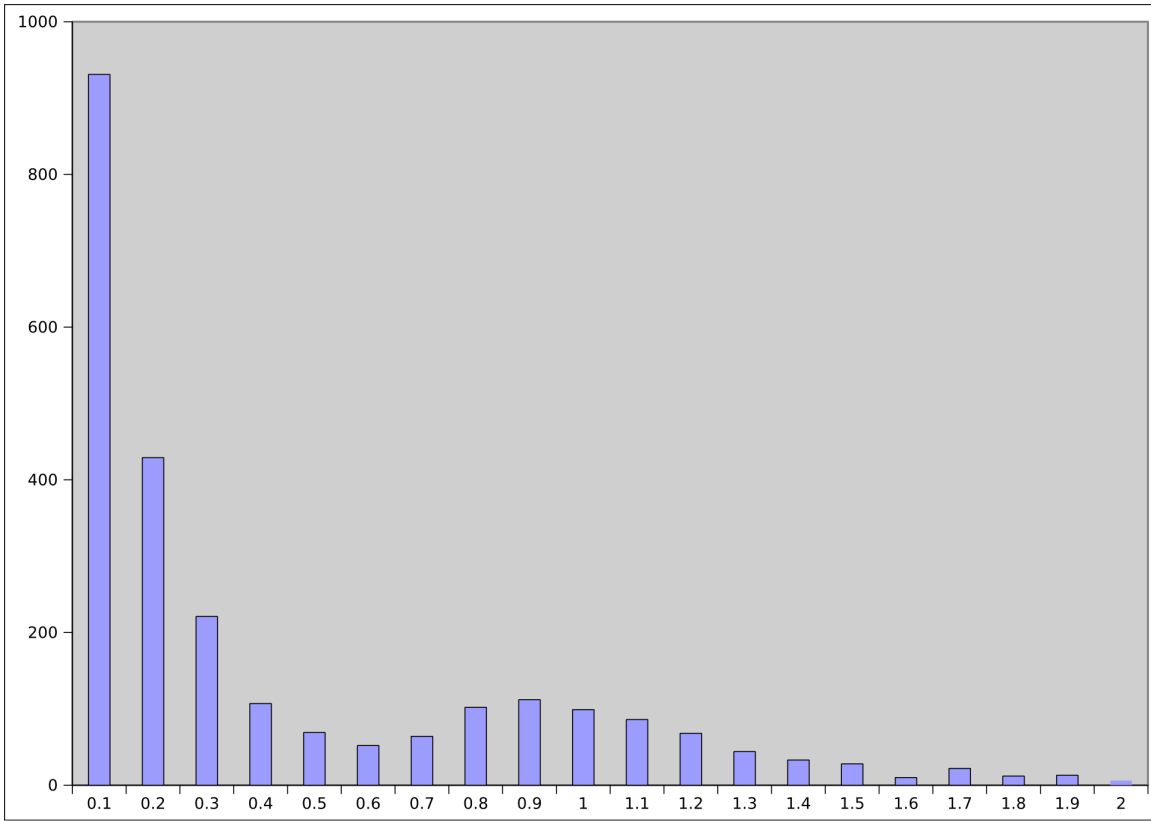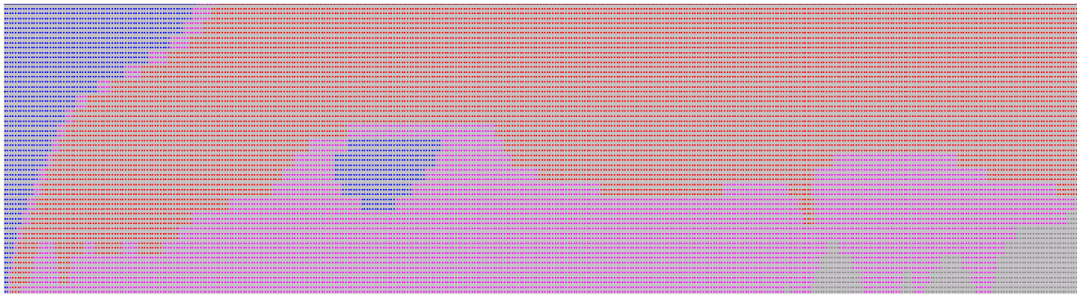

***Cichorium endivia***

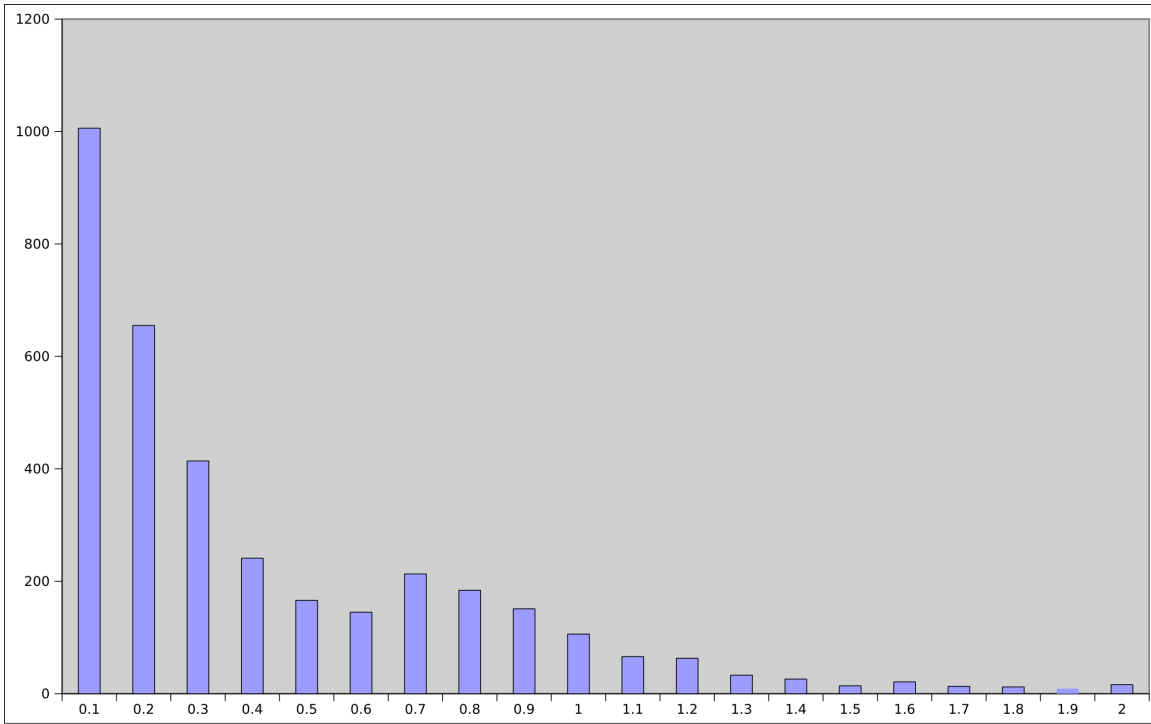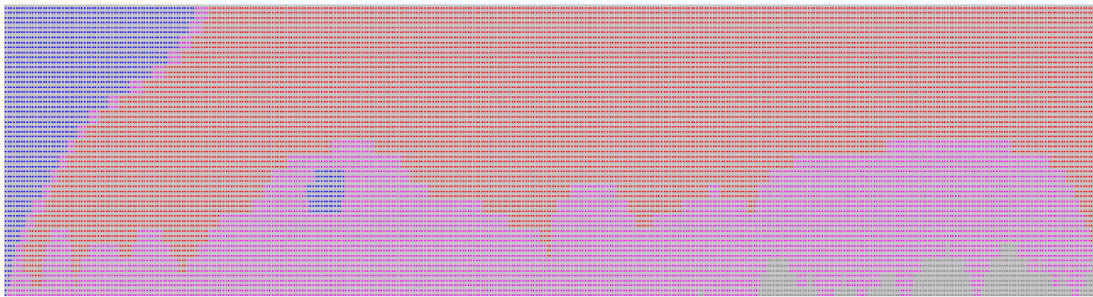

***Centaurea maculosa***

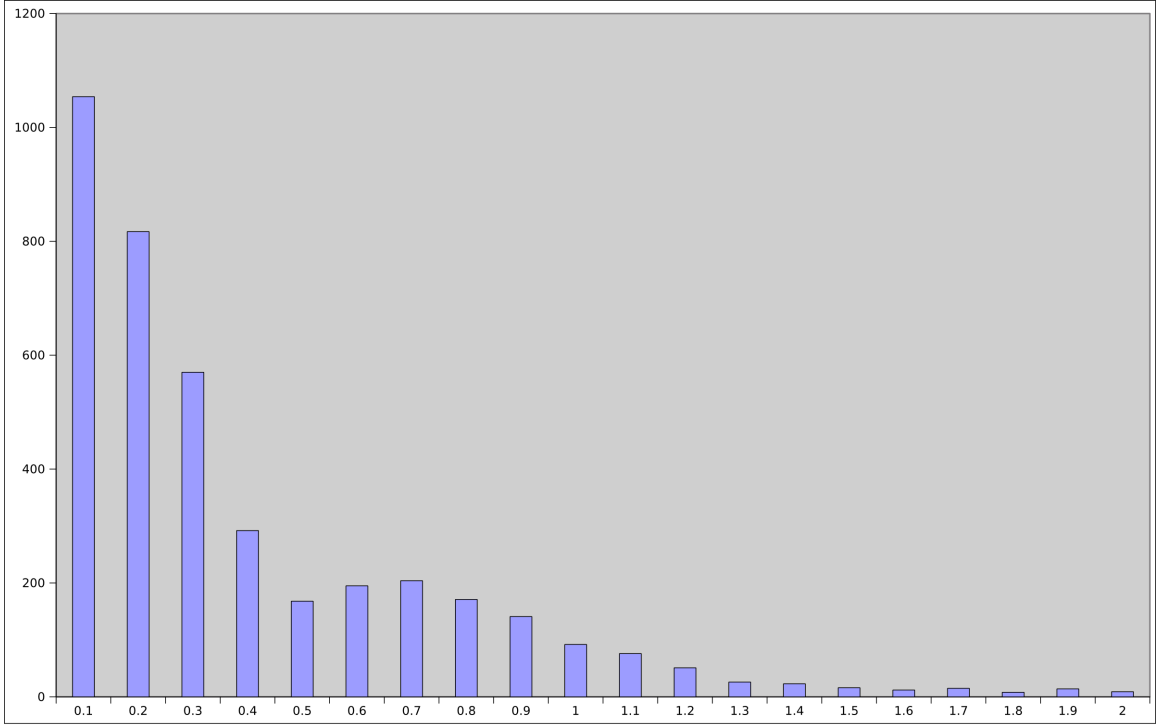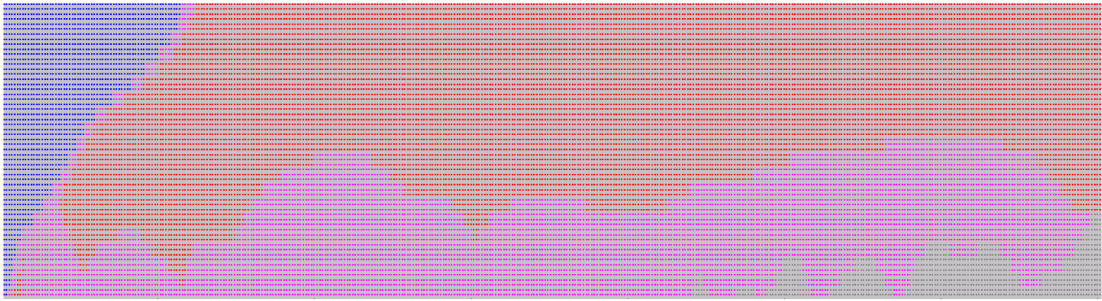

***Centaurea solstitialis***

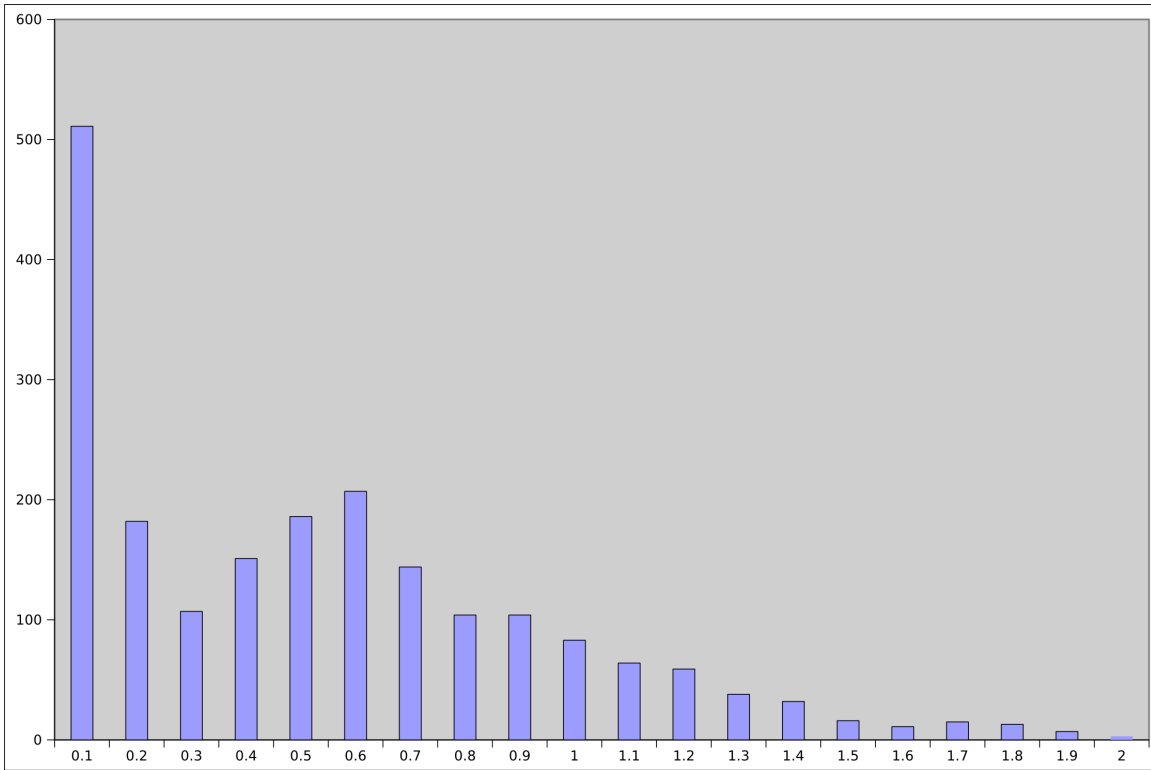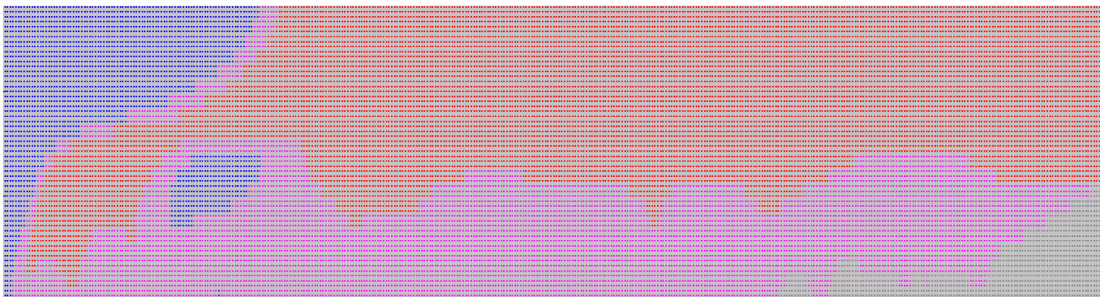

***Helianthus ciliaris***

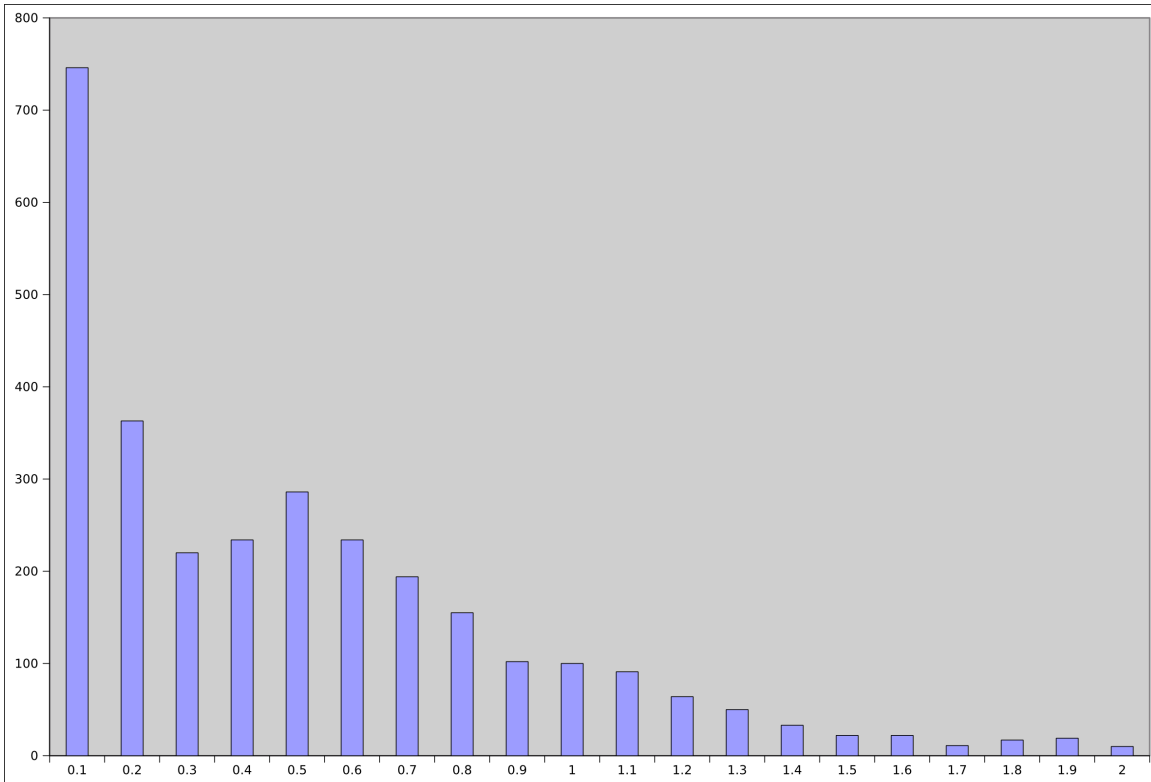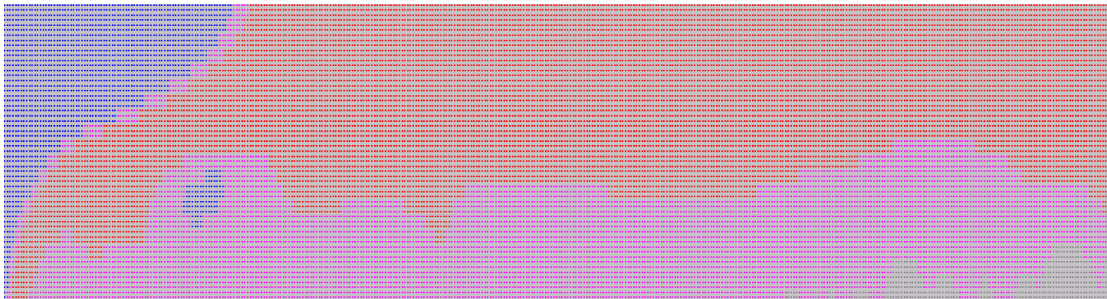

***Helianthus exilis***



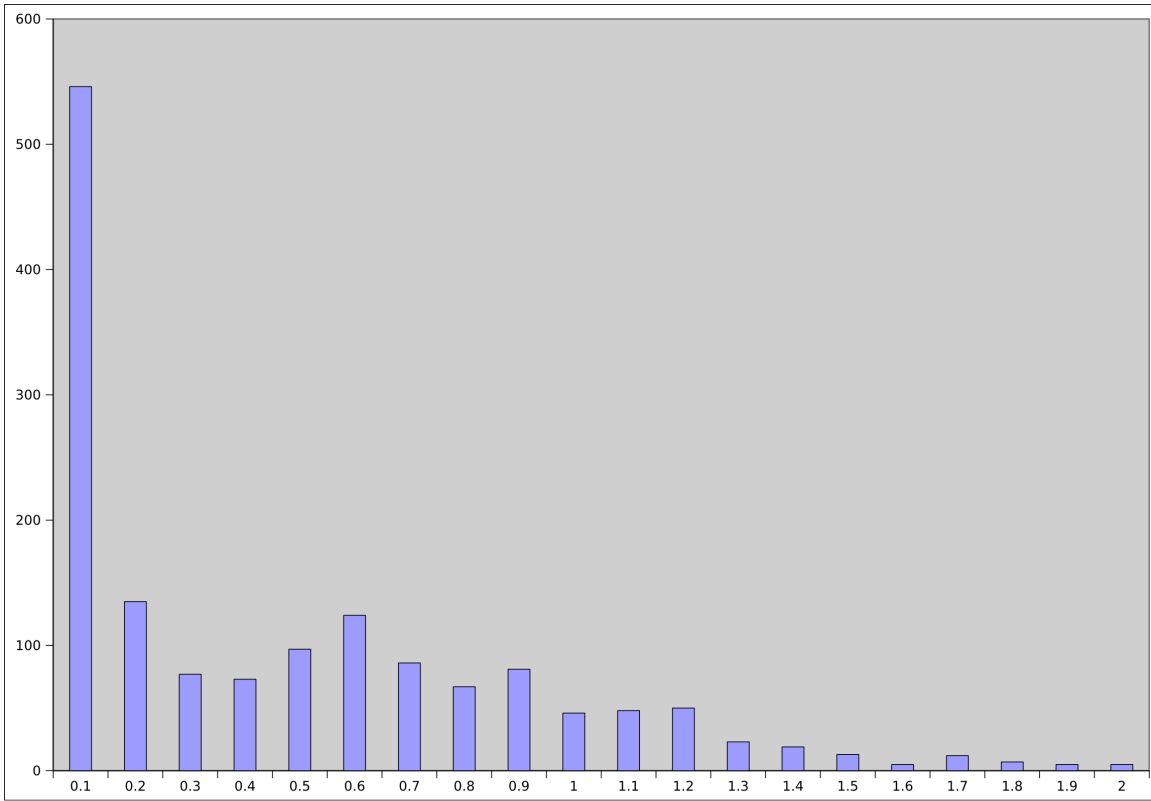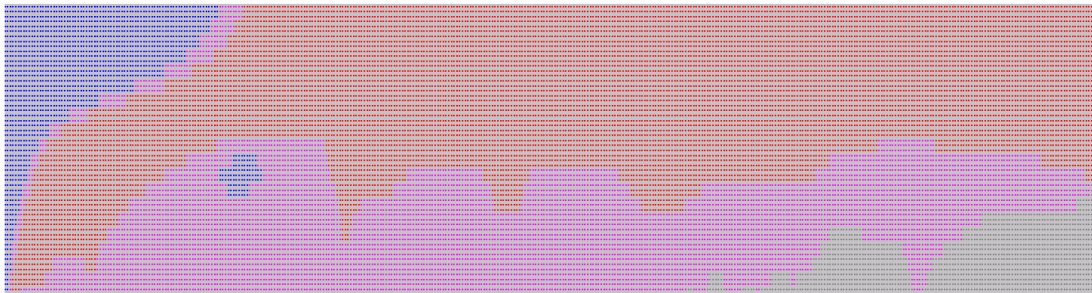

***Helianthus petiolaris***

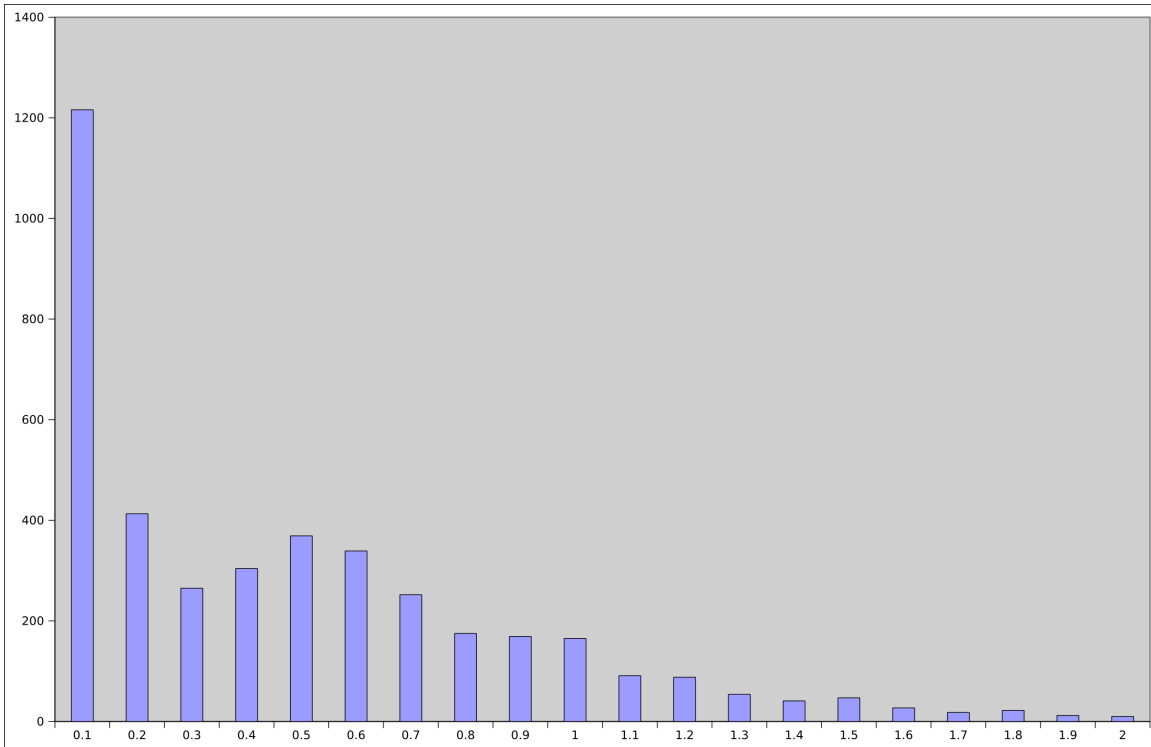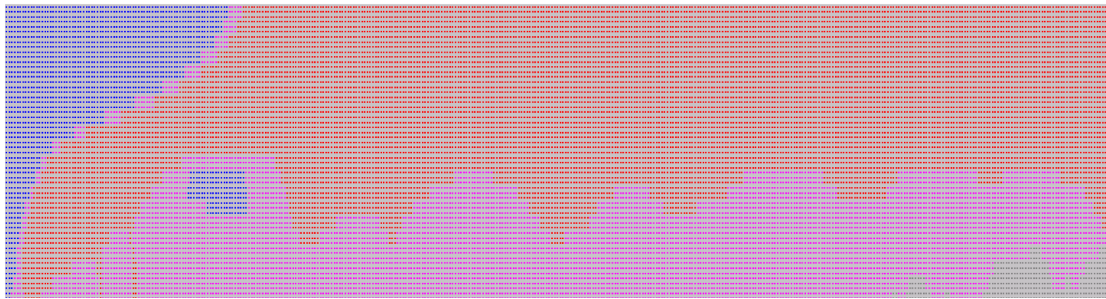

***Helianthus tuberosus***

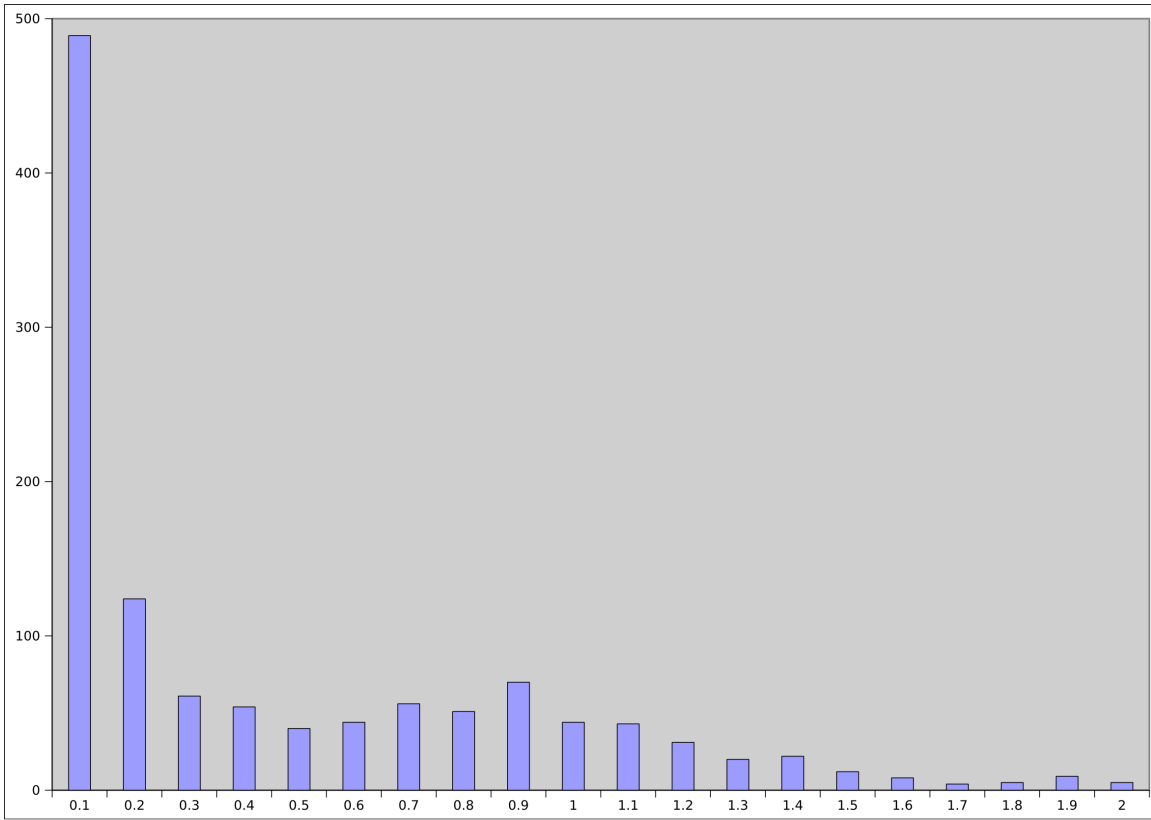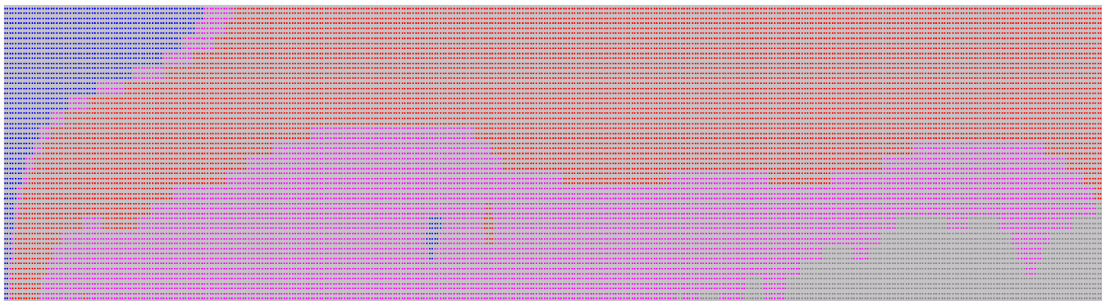

***Lactuca perennis***

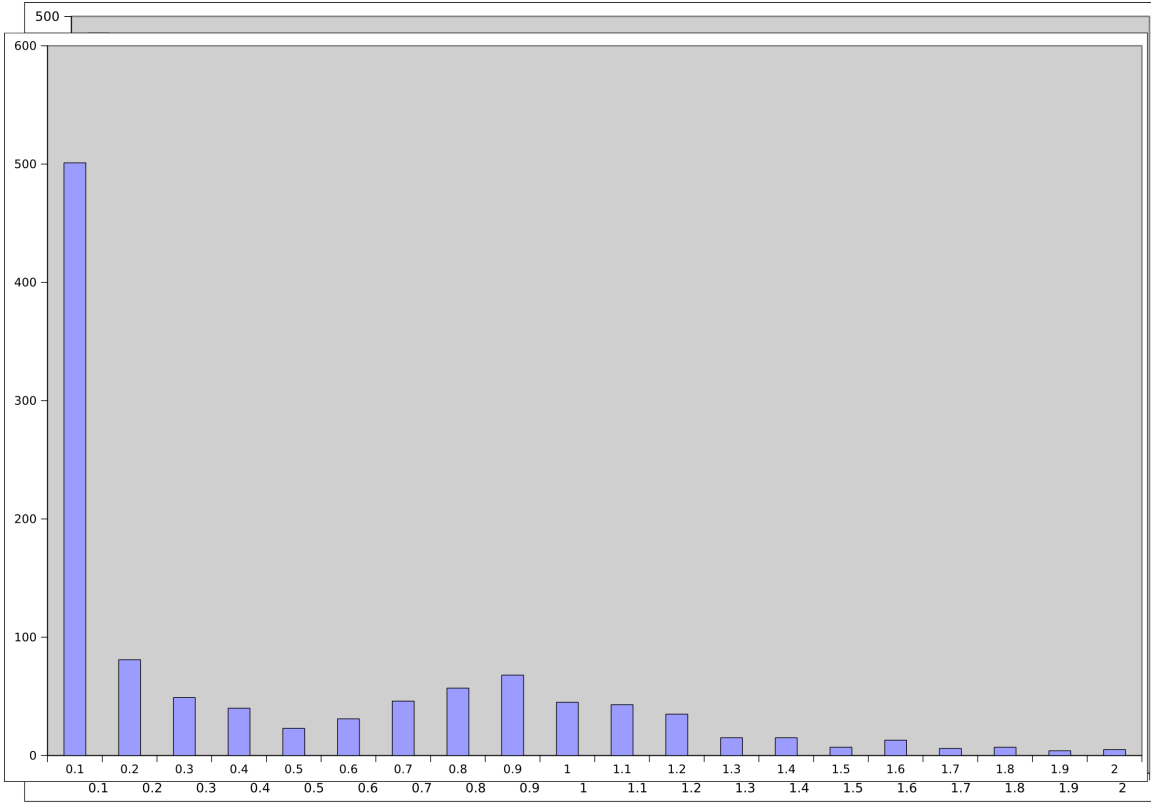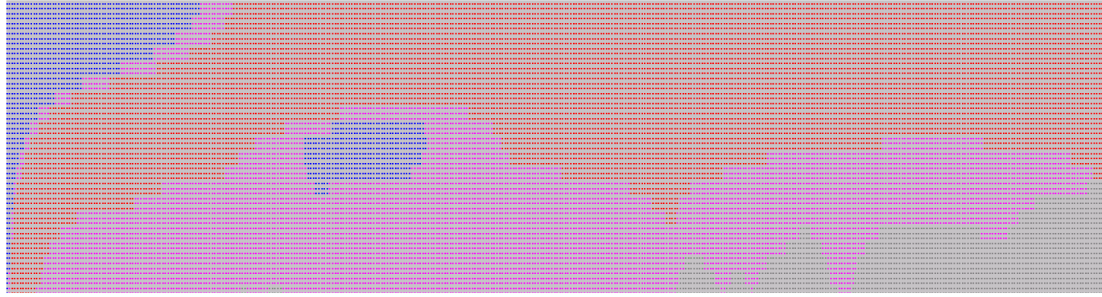

***Lactuca saligna***

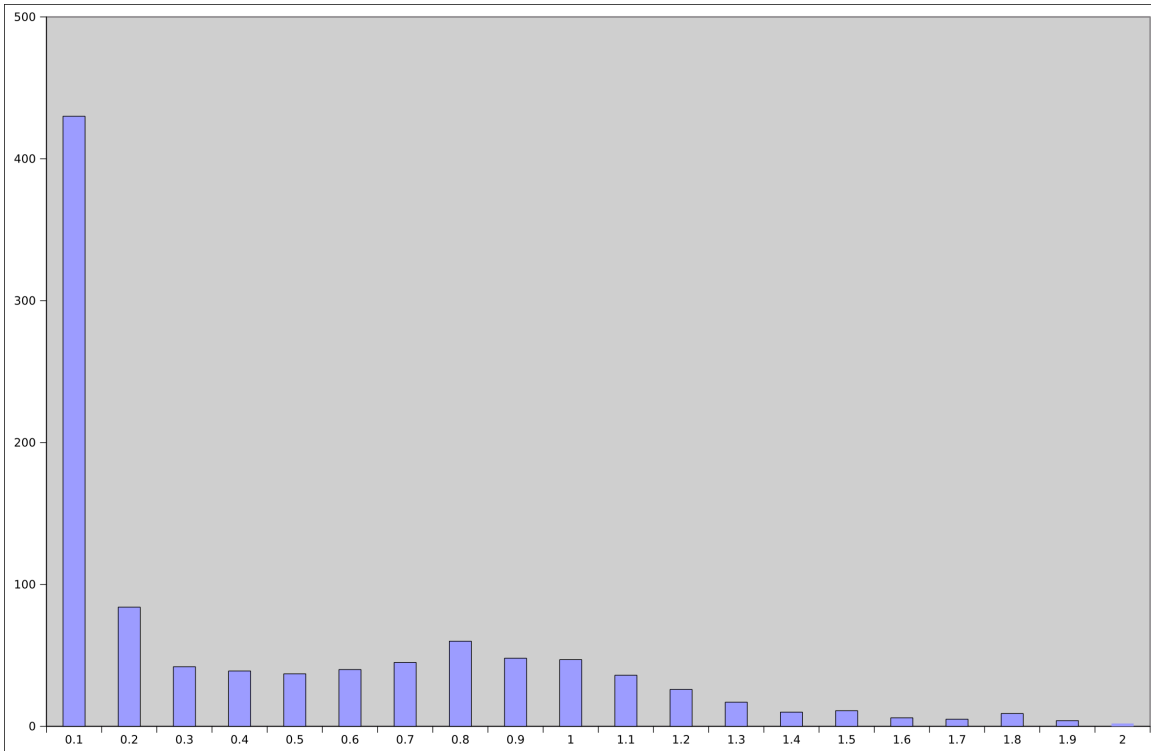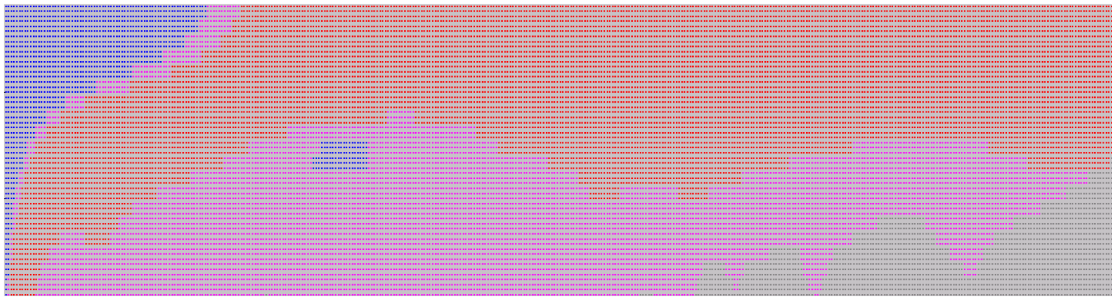

***Lactuca virosa***

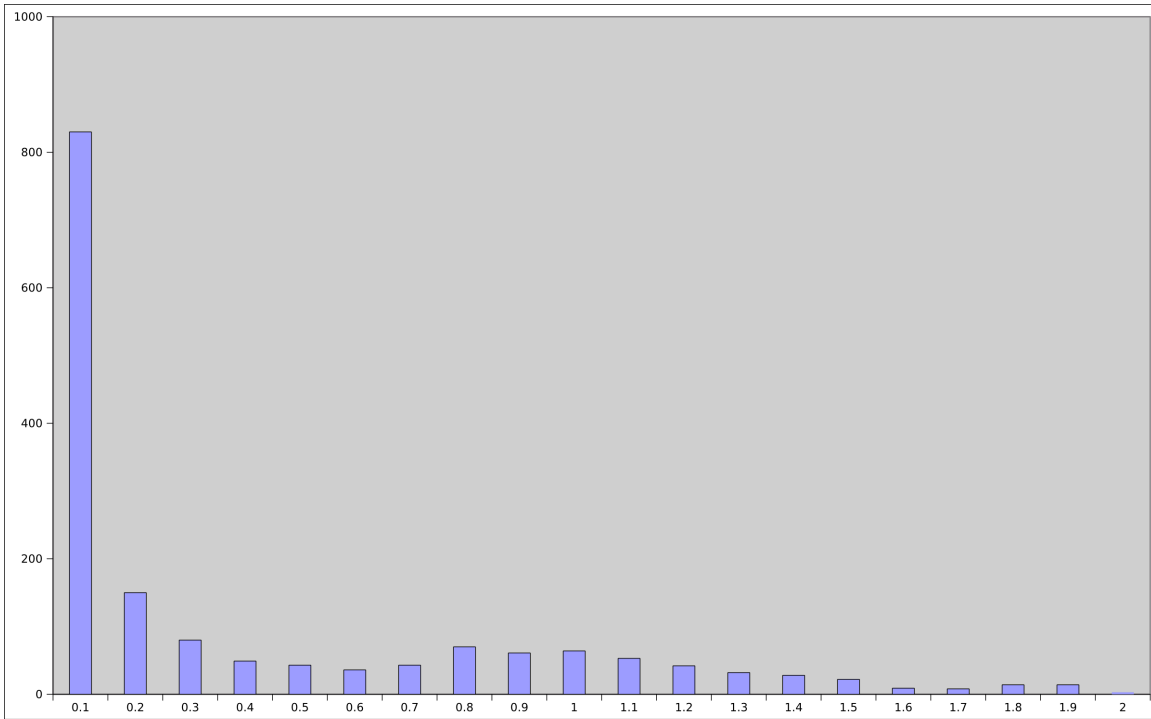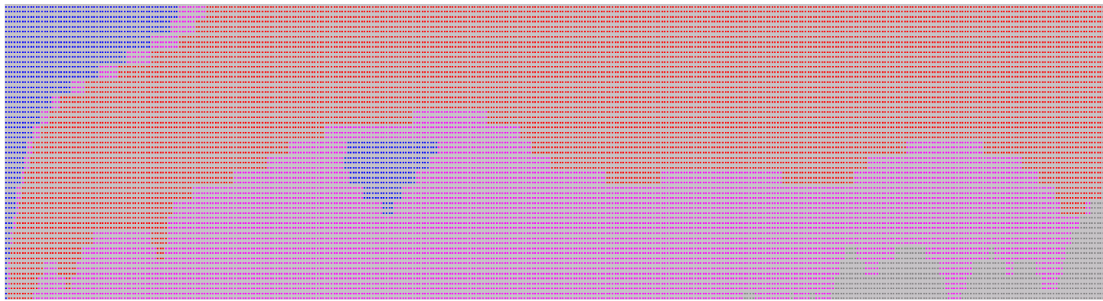

***Taraxacum officianale***
