# Supplementary material
Source: PubMed Central journal article supplement (PMC2727391)

Figure S1. Majority rule consensus cladogram of 36 nuclear gene orthologs (Table S1).

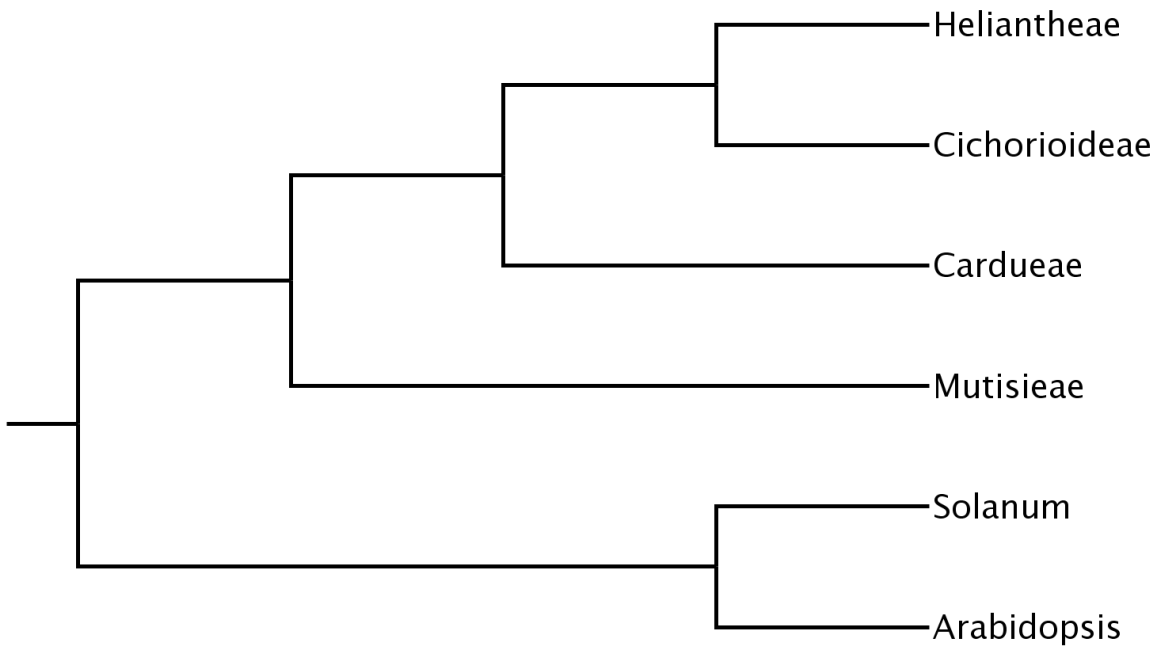

Supplement: msn187_1.pdf [file msn187_1.pdf]
